# Supplementary material for: Predictive Biomarkers for Checkpoint Inhibitor-Based Immunotherapy: The Galectin-3 Signature in NSCLCs
Source: PubMed Central journal article supplement (PMC6479404; doi:10.3390/ijms20071607), 2019-03-31
Supplement: ijms-20-01607-s001.pdf [file ijms-20-01607-s001.pdf]

| Patients | Tumor Subtype | EGFR gene mutational status (exons 18-19-20-21) | ALK translocations | ROS1 rearrangement | PDL1 (TPS %) |
|----------|---------------|-------------------------------------------------|--------------------|--------------------|--------------|
| 1        | SCC           | WT                                              | negative           | negative           | >50%         |
| 2        | SCC           | WT                                              | negative           | negative           | >50%         |
| 3        | Adc           | WT                                              | negative           | negative           | >50%         |
| 4        | Adc           | WT                                              | negative           | negative           | >50%         |
| 5        | Adc           | WT                                              | negative           | negative           | >50%         |
| 6        | Adc           | WT                                              | negative           | negative           | >50%         |
| 7        | Adc           | WT                                              | negative           | negative           | >50%         |
| 8        | Adc           | WT                                              | negative           | negative           | >50%         |
| 9        | Adc           | WT                                              | negative           | negative           | >50%         |
| 10       | Adc           | WT                                              | negative           | negative           | >50%         |
| 11       | SCC           | WT                                              | negative           | negative           | >50%         |
| 12       | Adc           | WT                                              | negative           | negative           | >50%         |
| 13       | SCC           | WT                                              | negative           | negative           | >50%         |
| 14       | Adc           | WT                                              | negative           | negative           | >50%         |
| 15       | Adc           | WT                                              | negative           | negative           | >50%         |
| 16       | Adc           | WT                                              | negative           | negative           | >50%         |
| 17       | Adc           | WT                                              | negative           | negative           | >50%         |
| 18       | Adc           | WT                                              | negative           | negative           | >50%         |
| 19       | Adc           | WT                                              | negative           | negative           | >50%         |
| 20       | Adc           | WT                                              | negative           | negative           | >50%         |
| 21       | SCC           | WT                                              | negative           | negative           | >50%         |
| 22       | Adc           | WT                                              | negative           | negative           | >50%         |
| 23       | Adc           | WT                                              | negative           | negative           | >50%         |
| 24       | Adc           | WT                                              | negative           | negative           | >50%         |
| 25       | Adc           | WT                                              | negative           | negative           | >50%         |
| 26       | Adc           | WT                                              | negative           | negative           | >50%         |
| 27       | SCC           | WT                                              | negative           | negative           | >50%         |
| 28       | Adc           | WT                                              | negative           | negative           | >50%         |
| 29       | Adc           | WT                                              | negative           | negative           | >50%         |
| 30       | Adc           | WT                                              | negative           | negative           | >50%         |

|    |     |    |          |          |      |
|----|-----|----|----------|----------|------|
| 31 | Adc | WT | negative | negative | >50% |
| 32 | Adc | WT | negative | negative | >50% |
| 33 | Adc | WT | negative | negative | >50% |
| 34 | Adc | WT | negative | negative | >50% |

**Legend:**

SCC: Squamous Cell Carcinoma;

Adc: Adenocarcinoma

EGFR: epidermal growth factor receptor

WT: wild type

ALK: Anaplastic lymphoma kinase

ROS1: ROS Proto-Oncogene1, Receptor Tyrosine Kinase

TPS: tumor proportion score

PD-L1 immunostaining with score > 50% (PD-L1 tumor expression) is specifically required for starting immunotherapy (Reck M. *et al. N. Engl. J. Med.* **2016**, 375,1823-1833 . PMID: 27718847)

**Supplementary table 2**

|                                 | <i>Fisher's exact test</i> |    | TOT | p value  |
|---------------------------------|----------------------------|----|-----|----------|
|                                 | iRECIST                    |    |     |          |
|                                 | CR – PR - SD               | PD |     |          |
| Negative/Low/Intermediate GAL-3 | 13                         | 0  | 13  | > 0.0001 |
| High GAL-3                      | 2                          | 19 | 21  |          |
| TOT                             | 15                         | 19 | 34  |          |

**Legend.**

CR: complete response; PR: partial response; SD: stable disease;

PD: progressive disease.

The two-tailed P value is less than 0.0001
